1           **Effect of antenatal tetramethylpyrazine on lung development and YAP**  
2           **expression in a rat model of experimental congenital diaphragmatic hernia**

3       Junzuo Liao<sup>1</sup>, Wenying Liu<sup>\*1,2</sup>, Libin Zhang<sup>1</sup>, Qin Li<sup>1</sup>, Fang Hou<sup>1</sup>

4       <sup>1</sup>Department of Pediatric Surgery, Sichuan Academy of Medical Sciences & Sichuan  
5       Provincial People's Hospital, School of Medicine, University of Electronic Science and  
6       Technology of China, Chengdu, Sichuan, China

7       <sup>2</sup>Institute of Laboratory Animals of Sichuan Academy of Medical Sciences & Sichuan  
8       Provincial People's Hospital, Chengdu, Sichuan, China

9       \* Corresponding author

10      Email: [364073181@qq.com](mailto:364073181@qq.com) (WL)

11      **Funding:**

12      This study was supported by the Applied Basic Research Project of the Science and  
13      Technology Department of Sichuan Province (2017JY0305) and the Chengdu Science and  
14      Technology Bureau Technology Benefit People Technology Research and Development  
15      Project (2015-HM01-00441-SF)

16

17

18

19

20

21

## 22 **Abstract**

23 Tetramethylpyrazine (TMP) is a chemical compound found in extracts derived from the Chinese  
24 medicinal plant. Due to its remarkable therapeutic effects, availability, and low cost and toxicity,  
25 TMP has been used to treat cardiovascular diseases and pulmonary hypertension in China. The  
26 aim of this study was to investigate the therapeutic effects and underlying mechanism of TMP on  
27 lung development using a rat model of nitrofen-induced congenital diaphragmatic hernia (CDH).  
28 Pregnant rats were divided into three groups: control, CDH, and CDH+TMP. Nitrofen was  
29 used to induce CDH. In the CDH and CDH+TMP, Fetuses only with left diaphragmatic  
30 hernias were chosen for analysis. Lung and body weight were recorded and lung histologic  
31 evaluations, image analysis, and western blot analysis of YAP , p-YAP and LATS1 were  
32 performed after lung processing. A marked abnormal structure was observed, as evidenced by  
33 pulmonary hypoplasia and vascular remodeling, in the CDH. These abnormalities were  
34 improved in the CDH+TMP. There were significant differences between the CDH and  
35 CDH+TMP in percentage of medial wall thickness, arteriole muscularization, radial alveolar  
36 counts, AA%, and alveolar septal thickness. YAP expression was markedly increased in the  
37 CDH compared to the control, which was not affected by antenatal TMP administration.  
38 However, prenatal TMP intervention significantly increased expression of LATS1 and

39 phosphorylation of YAP in the CDH fetuses. Our results demonstrate that antenatal TMP  
40 administration improved vascular remodeling and promoted lung development in a rat model  
41 of CDH, potentially through increasing expression of LATS1 and phosphorylation of YAP.

42 **Key words:** congenital diaphragmatic hernia; tetramethylpyrazine (TMP); YAP

43

## 44 **Introduction**

45 Congenital diaphragmatic hernia (CDH) is an uncommon congenital malformation,  
46 occurring in 1 to 4 of every 10,000 pregnancies[1]. Although medical and surgical  
47 management of CDH has improved, CDH is still associated with a high mortality rate of 60 -  
48 70% [2][2][4][5]. The disease name comes from the original abnormality involving a hole in  
49 the diaphragm, but over the last few decades clinicians have observed that the defect in the  
50 diaphragm is not a determinant of survival. The primary causes of mortality in CDH include  
51 pulmonary hypoplasia (PH) and severe persistent pulmonary hypertension of the newborn  
52 (PPHN) [6]. It was traditionally thought that PH was caused solely by herniation of the  
53 abdominal organs into the thorax through the pleuroperitoneal canals, which compresses the  
54 developing ipsilateral lung and limits the expansion of the contralateral lung. However,  
55 animal studies and evaluation of early human embryos have convincingly shown that  
56 abnormal pulmonary development in the embryonic phase is the primary defect [7].

57 Current postpartum care, surgery, or medical treatment strategies have not proven to be  
58 viable approaches for managing PH and improving the associated abnormal remodeling of the  
59 pulmonary vasculature. However, with the development of modern imaging technologies,

60 CDH can now be accurately diagnosed in mid-gestation [8][9]. Therefore, it seems feasible to  
61 consider prenatal intervention in cases with poor prognosis. Fetal surgical interventions, such  
62 as fetoscopic temporary tracheal occlusion, are invasive, technically demanding, and limited  
63 by maternal and fetal risks [10]. Evidence has demonstrated that tracheal occlusion does not  
64 increase survival compared with standard postnatal care [11]. Therefore, less invasive  
65 approaches, such as antenatal pharmacologic treatment to stimulate lung growth and  
66 maturation, have been proposed and investigated in the laboratory [13][14][14]. Although  
67 some drugs have been found to improve pulmonary maturity and abnormal pulmonary  
68 vascular remodeling in animal models, the potential side effects of antenatal treatments, such  
69 as glucocorticoids [15] and sildenafil [16], limit their use. Therefore, it is necessary to explore  
70 other pharmacologic antenatal interventions to determine which have fewer side effects.

71 Tetramethylpyrazine (TMP, also called ligustrazine) is a chemical compound found in  
72 extracts derived from the Chinese medicinal plant *Ligusticum wallichii* (*family Apiaceae*).  
73 TMP possesses typical characteristics as a calcium antagonist. Due to its remarkable  
74 therapeutic effects, availability, and low cost and toxicity, TMP has been considered an  
75 effective therapy for various diseases, such as cerebral ischemia, cardiovascular diseases, and  
76 pulmonary hypertension in China [17][18]. Moreover, in recent years, TMP has been found to  
77 be an effective and safe treatment for fetal growth restriction (FGR) [19].

78 Most of our current understanding about the structural and molecular changes in CDH  
79 originated from experimental animal models[20]. Administration of the herbicide nitrofen  
80 (2,4-dichloro-phenyl-pnitrophenyl ether) to pregnant rats on embryonic day 9.5 (E 9.5) has  
81 been shown to result in PH and diaphragmatic defects in the offspring, both remarkably

82 similar to human CDH[21][22].

83 The purpose of this study was to evaluate the effect of TMP on improving CDH-induced  
84 abnormal pulmonary vascular remodeling and PH in the nitrofen-induced CDH model. We  
85 also explored the possible underlying mechanism of TMP's effects by measuring expression  
86 and activation of Yes-associated protein (YAP), which is an important protein in pulmonary  
87 development and vascular reconstruction.

88

## 89 **Materials and methods**

### 90 **Experimental design and animal model**

91 All animals were provided by the Institute of Laboratory Animals of Sichuan Academy  
92 of Medical Sciences and Sichuan Provincial People's Hospital (Chengdu, China). The  
93 protocol was approved by the Committee on the Ethics of Animal Experiments of Sichuan  
94 Academy of Medical Sciences and Sichuan Provincial People's Hospital (Protocol Number:  
95 2018-198). All surgery was performed under sodium pentobarbital anesthesia, and all efforts  
96 were made to minimize suffering. This experiment was supported by Lilai Biotechnology  
97 (Chengdu, China). Twenty adult female Sprague-Dawley rats weighing 240 - 305 g (average,  
98 283 g) were used. All rats were bred after a night of controlled mating. A sperm-positive  
99 vaginal smear confirmed mating and represented embryonic day (E) 0.5. CDH was induced in  
100 pregnant rats at E9.5 via intragastric administration of a single oral dose of nitrofen (125 mg;  
101 99% purity; Zhejiang Chemicals, Ningbo, Zhejiang, China) that was dissolved in 2 ml of  
102 olive oil. Control rats received an equal amount of olive oil only. On E11.5, nitrofen-fed

103 pregnant rats were randomly divided into two groups: CDH or CDH+TMP. TMP (80 mg/kg,  
104 Livzon Pharmaceutical Group Inc., China) was intragastrically administered to pregnant rats  
105 on E11.5 once a day, for 10 days. In total, our study included three groups of pregnant rats as  
106 follows: control (n = 5), CDH (nitrofen-induced CDH, n = 5), and CDH+TMP  
107 (nitrofen-induced CDH with antenatal TMP treatment, n = 5). Rat fetuses were delivered via  
108 Cesarean on E21.5 (prior to full term, E22) and immediately beheaded after being weighed.  
109 Under an anatomic stereoscopic microscope, fetal lungs were removed and the bilateral  
110 diaphragms were carefully examined for CDH. Lung tissue weight (LW) and body weight  
111 (BW) of each fetus were recorded. The left lungs of the fetuses with left CDH only were  
112 removed and processed for further analysis.

## 113 **Lung preparation**

114 Lungs were placed into 4% paraformaldehyde, fixed at 4°C for 48 hours, and then  
115 embedded in paraffin for histological analysis. Paraffin-embedded fetal lungs were  
116 transversely cut into 5 µm sections with a microtome. Sections were stained with hematoxylin  
117 and eosin (H&E) and an elastin histochemical stain. Lung samples to be used for western blot  
118 analysis were stored at -80°C.

## 119 **Morphological analyses**

### 120 **Pulmonary vascular morphometric analysis**

121 Lung slices were deparaffinized and hydrated using conventional methods[23]. The  
122 sections were stained in Verhoeff's solution for 1 hour until the tissue sections were  
123 completely stained black. Then, the sections were washed in running tap water three times

124 and soaked in 2% ferric chloride for 1 - 2 minutes, rinsed briefly with tap water, and checked  
125 for black elastic fiber staining and gray background under a light microscope. The slides were  
126 treated with 3% sodium thiosulfate for 5 minutes and rinsed in running tap water for 5  
127 minutes. Slides were then counterstained in Van Gieson's solution for 5 minutes, dehydrated,  
128 and rinsed in graded alcohols and xylene, cover slipped, and observed under a light  
129 microscope.

130 External diameter (ED) and medial wall thickness (MT) of small pulmonary arteries with  
131 a diameter of 20 ~ 60  $\mu\text{m}$  that were associated with terminal bronchioles and distal airspaces  
132 were quantified using Image-Pro Plus 6.0 (Media Cybernetics, Inc., Chengdu, China). ED  
133 was defined as the distance between the external elastic laminae, and MT was defined as the  
134 distance between the internal and external elastic laminae. Percentage of medial wall  
135 thickness (%MT) was calculated using the following formula:  $2 \times \text{MT}/\text{ED} \times 100$  [24][25].  
136 Vessels with a measurable medial wall were considered muscularized; vessels without a  
137 medial wall were considered non-muscularized; and vessels with an incomplete medial wall  
138 were considered partially muscularized[15].

### 139 **Lung maturation measurement**

140 Lung growth was determined using the LW/BW ratio. The following morphological  
141 parameters were measured: (1) Radial alveolar count (RAC) was used as an index of alveolar  
142 proliferation and architectural maturity. RAC has been used to measure development of the  
143 terminal respiratory unit, as originally described by Emery and Mithal [25]. RAC was  
144 determined by counting the number of airspaces along a line drawn perpendicularly from the

145 center of a terminal or respiratory bronchiole to the closest edge of the acinus (pleural or  
146 lobular connective tissue septum). (2) Percentage of lung alveolar area per unit area (%AA)  
147 was measured by image analysis using Image Pro Plus version 6.0 (Media Cybernetics, Inc.,  
148 Chengdu, China). (3) Alveolar septal thickness was also measured.

## 149 **Western blot analysis**

150 Lung tissues were homogenized in RIPA buffer supplemented with Complete Protease  
151 Inhibitor Cocktail tablets (Roche) and phosSTOP Phosphatase Inhibitor Cocktail tablets  
152 (Roche). Protein concentrations were determined using the Pierce BCA assay (Rockford, IL).  
153 Total protein (50  $\mu$ g) was linearized in Laemmli sample buffer (Bio-Rad, USA) and then  
154 separated by gel electrophoresis using prefabricated 10% SDS polyacrylamide gels  
155 (Invitrogen). Proteins were then transferred to PVDF membranes (Hybond, USA).  
156 Immediately after transfer, the membranes were blocked with 5% bovine serum albumin  
157 (BSA) for 2 hours before antibody detection. Primary antibodies against YAP (1:500, CST),  
158 large tumor suppressor kinase 1 (LATS1) (1:300, Proteintech), phosphorylated (p)-YAP  
159 (1:1,000, CST), and  $\beta$ -actin (1:5000, Abcam) were incubated overnight at 4°C. The  
160 membranes were further incubated with a goat anti-rabbit secondary antibody (1:5,000,  
161 Abcam) at room temperature for 2~3 hours followed by extensive washing. An enhanced  
162 chemiluminescence (ECL) kit (Thermo, USA) was used for antibody detection. All antibodies  
163 used in this study were diluted in phosphate buffered saline (PBS). The gel image analysis  
164 system (Tanon, China) was used for scanning analysis and the results are presented as relative  
165 expression of the target protein calculated as: target protein expression = integrated optical  
166 density value of target protein / internal reference integrated optical density value.



## 167 **Statistical analysis**

168 Values are presented as mean  $\pm$  standard deviation (SD). All data were statistically  
169 analyzed using SPSS, version 21 (SPSS, Inc, Chicago, III). Statistical analysis was performed  
170 using one-way ANOVA and the Chi-square test. Values of  $P < .05$  are considered statistically  
171 significant.

172

## 173 **Results**

### 174 **Incidence of CDH and pulmonary vascular remodeling**

175 We determined the incidence of CDH in the three groups: none of the 80 fetuses in the  
176 control group presented with CDH; 48 out of 70 fetuses (68.6%) presented with CDH in the  
177 CDH group; and 51 out of 76 (67.1%) fetuses presented with CDH in the CDH+TMP group.  
178 There were no significant differences in CDH incidence between the CDH and CDH+TMP  
179 groups ( $P = .85$ ). In the experimental groups, fetuses with left CDH only were included in our  
180 analyses (Table 1). Accordingly, the fetuses were further divided into three groups: controls  
181 ( $n = 80$ ), CDH ( $n = 35$ ), and CDH+TMP ( $n = 41$ ).

182

183 **Table 1. Pulmonary vascular morphometry**

| Group | N | ED ( $\mu\text{m}$ ) | %MT | Wall structure (%) |    |    |
|-------|---|----------------------|-----|--------------------|----|----|
|       |   |                      |     | M                  | PM | NM |

|         |    |              |              |            |            |               |
|---------|----|--------------|--------------|------------|------------|---------------|
| Control | 80 | 25.22±8.82&  | 17.86±4.18   | 49.56±9.76 | 4.27±1.85  | 46.17±8.97    |
| CDH     | 35 | 30.19±11.35  | 34.84±5.91*  | 58.46±11.2 | 15.69±4.77 | 25.85±9.39§   |
| CDH+TMP | 41 | 27.27±9.87&& | 18.54±4.11** | 51.07±8.90 | 7.69±2.05  | 41.24±10.11§§ |

184 Values are expressed as  $\bar{x} \pm s$ . M: fully muscularized; PM: partially muscularized; NM:  
 185 non-muscularized. & P = .57, && P = .71, vs Control; \* P < .01, vs Control; \*\* P < .01, vs  
 186 CDH; § P < 0.01, vs Control; §§ P < .01, vs CDH.

187 Comparison of pulmonary vascular morphometry showed that ED was not statistically  
 188 different between the CDH group and the other groups ( $P = .57$ ,  $P = .71$ ). Fetuses in the CDH  
 189 group had a significantly increased %MT and decreased non-muscularized vessels compared  
 190 to the controls ( $P < .01$ ,  $P < .01$ ), whereas the fetuses in the CDH+TMP group showed  
 191 significantly reduced %MT and increased non-muscularized vessels compared to the CDH  
 192 group ( $P < .01$ ,  $P < .01$ ) (Table 1, Fig 1).

193 **Fig 1.** Medial wall thickness of the pulmonary artery was significantly increased in the CDH  
 194 group (B) compared to the control group (A). Medial wall thickness was decreased in the  
 195 CDH+TMP group (C) compared to the CDH group (B) (VVG, original magnification ×400).

## 196 **LW/BW ratio and lung morphometric analysis**

197 Similar to our previous study, fetal lungs in the CDH group were markedly hypoplastic,  
 198 as evidenced by lower LW/BW ratios, decreased RAC and %AA, and thicker alveolar septum  
 199 compared to the CDH group. Treatment with TMP significantly promoted fetal lung

200 development, but the development still lagged compared to controls. The results are shown in  
201 Table 2 and Fig 2.

202 **Table 2.** LW/BW ratio and lung morphometric analysis

| Group   | N  | %LW/BW                                | RAC                         | %AA                                                 | Alveolar septal thickness( $\mu\text{m}$ )    |
|---------|----|---------------------------------------|-----------------------------|-----------------------------------------------------|-----------------------------------------------|
| Control | 80 | 3.31 $\pm$ 0.29                       | 5.7 $\pm$ 0.8               | 67.3 $\pm$ 9.8                                      | 13.53 $\pm$ 3.22                              |
| CDH     | 35 | 2.29 $\pm$ 0.36 <sup>&amp;</sup>      | 2.3 $\pm$ 0.3 <sup>*</sup>  | 43.6 $\pm$ 6.5 <sup><math>\Delta</math></sup>       | 22.02 $\pm$ 5.06 <sup><math>\S</math></sup>   |
| CDH+TMP | 41 | 2.99 $\pm$ 0.41 <sup>&amp;&amp;</sup> | 3.1 $\pm$ 0.4 <sup>**</sup> | 57.1 $\pm$ 7.5 <sup><math>\Delta\Delta</math></sup> | 14.70 $\pm$ 3.87 <sup><math>\S\S</math></sup> |

203 Values are expressed as  $\bar{x} \pm s$ . &  $P < .01$ , vs Control; &&  $P = .02$ , vs CDH; \*  $P < .01$ , vs  
204 Control; \*\*  $P < .01$ , vs CDH;  $\Delta$   $P < .01$ , vs Control;  $\Delta\Delta$   $P < .01$ , vs CDH;  $\S$   $P < .01$ , vs  
205 Control;  $\S\S$   $P < .01$ , vs CDH.

206 **Fig 2.** Lungs from the CDH group (B) were characteristic of the fetal canalicular stage,  
207 showing poorly formed saccules and thickened septal walls compared to lungs in the control  
208 group (A), which showed well-differentiated saccules and thin septal walls. Striking changes,  
209 including an increase in air saccule size, thin septal walls, and maturation of the pulmonary  
210 interstitium, (H&E, original magnification  $\times 100$ ) were seen in the CDH+TMP (C) groups.

## 211 **Western blot analysis of YAP, LATS1, and p-YAP**

212 YAP expression was significantly increased in fetal lungs from the CDH group  
213 compared to the control group ( $P < .01$ ), while there was no significant difference in LATS1  
214 between the two groups ( $P = .65$ ). TMP prenatal intervention did not significantly affect YAP

215 expression ( $P = .28$ ), but significantly increased LATS1 ( $P < .01$ ) and p-YAP ( $P < .01$ )  
216 expression in the CDH lung tissues. Equal loading of electrophoresis gels was confirmed by  
217  $\beta$ -actin staining of the stripped membranes (**Fig 3**).

218 **Fig 3.** (A) Western blot analysis of lysates derived from control, CDH, and CDH+TMP lung  
219 tissues. (B) YAP expression was significantly increased in the lungs of the CDH group  
220 compared to the control group ( $P < .01$ ). TMP prenatal intervention did not significantly  
221 affect YAP expression in CDH fetal lung tissue ( $P = .28$ ), but significantly increased LATS1  
222 ( $P < .01$ ) and p-YAP ( $P < .01$ ) expression.

223

## 224 **Discussion**

225 TMP has been used in traditional Chinese medicine for many years to treat various  
226 diseases, including pulmonary hypertension, cardiovascular and neurovascular disease, FGR,  
227 and others. Therefore, we hypothesized that TMP could also be used to treat CDH with PH  
228 and PPHN. In this study, we used a rat nitrofen-induced CDH model to evaluate the effects of  
229 prenatal TMP administration on improving pulmonary vascularization. Our results indicate  
230 that prenatal TMP therapy significantly reduced medial thickness of small arteries and  
231 increased the number of non-muscularized arteries, while decreasing the number of fully or  
232 partially muscularized arteries in CDH rats. These data indicate that TMP decreases vascular  
233 remodeling, resulting in increased pulmonary blood flow, and further suggests that pulmonary  
234 hypertension in CDH rats can be alleviated by prenatal TMP therapy. However, the  
235 mechanism by which TMP inhibits pulmonary vascular remodeling in the CDH rat model

236 remains unclear. Emerging evidence supports that YAP plays an important role in vascular  
237 remodeling and related cardiovascular diseases [27]. Therefore, we hypothesized that TMP  
238 alters YAP expression and activation in CDH.

239 In mammals, YAP is the key functional effector of the hippo pathway, which mainly  
240 comprises mammalian STE20-like protein kinase 1/2 (MST1/2), Salvador family WW  
241 domain containing 1 (SAV1), large tumor suppressor 1/2 (LATS1/2), Mps one binder  
242 (MOB1), YAP/transcriptional coactivator with PDZ-binding motif (TAZ), and transcriptional  
243 enhancer associate domain family members 1-4 (TEAD1-4) [28][29]. When the Hippo  
244 pathway is activated, the YAP/TAZ complex is phosphorylated by LATS1/2, which results in  
245 its nuclear exclusion, ubiquitination, and subsequent proteolytic degradation [30]. Hippo/YAP  
246 signaling plays an important role in cardiovascular development and vascular homeostasis  
247 [31]. Moreover, Hippo/YAP signaling has been found to contribute to vascular remodeling  
248 and related cardiovascular diseases, including pulmonary hypertension, atherosclerosis, aortic  
249 aneurysms, restenosis, and angiogenesis [27]. New evidence suggests that YAP regulates  
250 proliferation and survival of pulmonary arterial vascular smooth muscle cells (VSMCs) and  
251 pulmonary vascular remodeling [32][33]. In addition, LATS1 was found to be inactivated in  
252 small remodeled pulmonary arteries, as well as distal pulmonary arterial VSMCs in idiopathic  
253 pulmonary hypertension [32]. In our study, we found that upregulated YAP expression in the  
254 CDH rats was associated with increased pulmonary vascular resistance and altered pulmonary  
255 arterial muscularization. We also found that TMP treatment increased LATS1 expression and  
256 YAP phosphorylation. Therefore, we speculate that pulmonary vessel remodeling and  
257 pulmonary hypertension in CDH is partly due to an increase in LATS1 and YAP expression

258 and activity.

259 YAP transcriptional targets often include positive regulators of cell proliferation and  
260 negative regulators of cell death. Thus, inactivation of Hippo signaling leads to organ  
261 enlargement, which is a signature phenotype of Hippo pathway activation [34][35]. However,  
262 in this study, we found that increased YAP expression in CDH lung tissues did not lead to  
263 increased lung size; rather, upregulation of YAP led to a decrease in lung size and an apparent  
264 cessation in development. A recent study suggested that early inactivation of the Hippo  
265 pathway during early stages of lung development resulted in a sharp decrease, rather than the  
266 expected increase, in lung size [36]. Furthermore, researchers found that, despite nuclear YAP  
267 localization in the epithelium, *Shhcre;Lats* mutant rats had smaller lungs with halted  
268 development after primary branch formation, one of the more severe lung developmental  
269 phenotypes. This developmental defect is likely attributed to disrupted localization of  
270 apical-basal polarity determinants, cell adhesion molecules, extracellular matrix components,  
271 and spindle misorientation in dividing cells. Instead of a single cell layer of epithelium that is  
272 critical for effective extension and growth of the branches, *Shhcre;Lats* mutant rats showed a  
273 multilayered epithelium with cells protruding into the lumen. Similar phenotypes were also  
274 described in the kidneys and salivary glands of transgenic animals over-expressing YAP or  
275 mutants with a *LATS1/2* deletion [37][38]. These findings suggest that in branching organs,  
276 such as the lung, kidney, and salivary gland, there is a primary role for Hippo signaling to  
277 maintain an organized epithelium, which is critical for degerming organ size [36]. Moreover,  
278 increased Yap activity could lead to impaired differentiation and maturation of lung epithelial  
279 cells and decreased surfactant proteins [39][40], all of which are in accordance with many

280 disease manifestations in CDH lung tissues.

281 Interestingly, we found that antenatal administration of TMP was beneficial for  
282 improving PH, as evidenced by the LW/BW ratio, alveolar septal thickness, RAC, and %AA  
283 in the CDH+TMP group compared to the CDH group. We speculate that these results are  
284 related to increased LATS1 expression and inhibition of YAP activity.

285 This study is the first to report the effects of prenatal TMP administration on lung  
286 development in a rat model of CDH. We revealed a significant role of Hippo signaling in  
287 CDH-associated PH and pulmonary hypertension. We also found that antenatal nitrofen  
288 exposure increased YAP expression and structural abnormalities in the lung, including  
289 abnormal vascular remodeling and impaired alveolarization. We also noted that antenatal  
290 TMP treatment promoted lung development and improved vascular remodeling. Although  
291 further studies are needed to determine the exact mechanisms of CDH-induced PH and  
292 antenatal TMP administration in improving lung structure, the current findings suggest that  
293 increased YAP activity is associated with delayed pulmonary development and abnormal  
294 vascular remodeling, and antenatal TMP therapy improves lung structure and function via  
295 increasing LATS1 expression and phosphorylation of YAP.

296 There are several limitations to note in our study. There was a lack of data regarding the  
297 whole process of fetal lung development, and therefore we could not dynamically reflect the  
298 changes of the Hippo signaling pathway in lung development. Furthermore, there was a lack  
299 of direct evidence supporting the relationship between the Hippo signaling pathway,  
300 CDH-induced PH, and TMP prenatal intervention. These limitations need to be addressed in

301 future studies.

302

## 303 **Availability of data and materials**

304 The authors declare that all data supporting the findings of this study are available within the  
305 article or from the corresponding authors on reasonable request.

306

## 307 **Acknowledgements**

308 We wish to thank Honghui Jia and Lin Wang for kindly guiding the establishment of animal  
309 models. We thank Lin Jiang for statistical analysis.

310

## 311 **Authors' contributions**

312 JZ Liao is first author. WY Liu obtained funding. JZ Liao, Q Li, LB Zhang, and WY Liu  
313 designed the study. JZ Liao, Q Li, and LB Zhang collected the data. JZ Liao and Q Li were  
314 involved in data cleaning and verification. JZ Liao and Q Li analyzed the data. JZ Liao  
315 drafted the manuscript. WY Liu, JZ Liao, and F Hou contributed to the interpretation of the  
316 results and critical revision of the manuscript for important intellectual content and approved  
317 the final version of the manuscript. All authors have read and approved the final manuscript.  
318 JZ Liao and WY Liu are the study guarantors.

## 319 **Competing interests**



320 The authors declare no competing interests.

## 321 **References**

322 [1] Dolk H, Loane M, Garne E. The prevalence of congenital anomalies in Europe. *Adv Exp*  
323 *Med Biol.* 2010; 686:349-364.

324 [2] van den Hout L, Schaible T, Cohen-Overbeek TE, Hop W, Siemer J, van de Ven K, et al.  
325 Actual outcome in infants with congenital diaphragmatic hernia: the role of a standardized  
326 postnatal treatment protocol. *Fetal Diagn Ther.* 2011; 29: 55-63.

327 [3] Harting MT, Lally KP. The congenital diaphragmatic hernia study group registry update.  
328 *Semin Fetal Neonatal Med.* 2014; 19:370-375.

329 [4] Wright JC, Budd JL, Field DJ, Draper ES. Epidemiology and outcome of congenital  
330 diaphragmatic hernia: a 9-year experience. *Paediatr Perinat Epidemiol.* 2011; 25:144-149.

331 [5] Seetharamaiah R, Younger JG, Bartlett RH, Hirschl RB. Factors associated with survival  
332 in infants with congenital diaphragmatic hernia requiring extracorporeal membrane  
333 oxygenation: a report from the Congenital Diaphragmatic Hernia Study Group. *J Pediatr*  
334 *Surg.* 2009; 44:1315-1321.

335 [6] Gosche JR, Islam S, Boulanger SC. Congenital diaphragmatic hernia: searching for  
336 answers. *Am J Surg.* 2005; 190:324-332.

337 [7] Keijzer R, Liu J, Tibboel D, Post M. Dual-hit hypothesis explains pulmonary hypoplasia  
338 in the nitrofen model of congenital diaphragmatic hernia. *Am J Pathol.* 2000; 156:1299-1306.

- 339 [8] Burgos CM, Hammarqvist-Vejde J, Frenckner B, Conner P. Differences in outcomes in  
340 prenatally diagnosed congenital diaphragmatic hernia compared to postnatal detection: a  
341 single-center experience. *Fetal Diagn Ther*. 2016; 39:241-247.
- 342 [9] Mehollin-Ray AR, Cassady CI, Cass DL, Olutoye OO. Fetal MR imaging of congenital  
343 diaphragmatic hernia. *Radiographics*. 2012; 32:1067-1084.
- 344 [10] Jani JC, Nicolaides KH, Gratacos E, Valencia CM, Done E, Martinez JM, et al. Severe  
345 diaphragmatic hernia treated by fetal endoscopic tracheal occlusion. *Ultrasound Obstet*  
346 *Gynecol*. 2009; 34:304-310.
- 347 [11] Harrison MR, Keller RL, Hawgood SB, Kitterman JA, Sandberg PL, Farmer DL, et al. A  
348 randomized trial of fetal endoscopic tracheal occlusion for severe fetal congenital  
349 diaphragmatic hernia. *N Engl J Med*. 2003; 349:1916-1924.
- 350 [12] Oue T, Taira Y, Shima H, Miyazaki E, Puri P. Effect of antenatal glucocorticoid  
351 administration on insulin-like growth factor I and II levels in hypoplastic lung in  
352 nitrofen-induced congenital diaphragmatic hernia in rats. *Pediatr Surg Int*. 1999; 15:175-179.
- 353 [13] Yu J, Gonzalez S, Diez-Pardo JA, Tovar JA. Effects of vitamin A on malformations of  
354 neural-crest-controlled organs induced by nitrofen in rats. *Pediatr Surg Int*. 2002; 18:600-605.
- 355 [14] Luong C, Rey-Perra J, Vadivel A, Gilmour G, Sauve Y, Koonen D, et al. Antenatal  
356 sildenafil treatment attenuates pulmonary hypertension in experimental congenital  
357 diaphragmatic hernia. *Circulation*. 2011; 123:2120-2131.
- 358 [15] Liu WY, Feng JX, Jia HH, Tang YM, Hu TZ, Jiang XP, et al. Effect of prenatal

- 359 tetrandrine therapy on pulmonary vascular structural remodeling in the nitrofen-induced CDH  
360 rat model. Chinese Medical Journal. 2002; 113:813-816.
- 361 [16] Groom KM, Ganzevoort W, Alfirevic Z, Lim K, Papageorghiou AT. Clinicians should  
362 stop prescribing sildenafil for fetal growth restriction (FGR): comment from the STRIDER  
363 Consortium. Ultrasound Obstet Gynecol. 2018; 52:295-296.
- 364 [17] Cai YN, Barer GR. Effect of ligustrazine on pulmonary vascular changes induced by  
365 chronic hypoxia in rats. Clinical Science. 1989; 77:515-520.
- 366 [18] Li Jian-sheng, Wang Hai-feng, Bai Yun-ping, Li SY, Yu XQ, Li Y. Ligustrazine  
367 Injection for Chronic Pulmonary Heart Disease:A Systematic Review and Meta-Analysis.  
368 Evidence-Based Complementary and Alternative Medicine. 2012,(2011-06-15), 2011,  
369 2012(2):792726.
- 370 [19] Shu-Wei Li, Yi Ling, Song Jin, Lin YF, Chen ZJ, Hu CX, et al. Expression of soluble  
371 vascular endothelial growth factor receptor-1 and placental growth factor in fetal growth  
372 restriction cases and intervention effect of tetramethylpyrazine. Asian Pacific Journal of  
373 Tropical Medicine. 2014;7:663-667.
- 374 [20] van Loenhout RB, Tibboel D, Post M, Keijzer R. Congenital diaphragmatic hernia:  
375 comparison of animal models and relevance to the human situation. Neonatology  
376 2009;96:137-149.
- 377 [21] Montedonico S, Nakazawa N, Puri P. Congenital diaphragmatic hernia and  
378 retinoids:searching for an etiology. Pediatr Surg Int. 2008;24:755-761.

- 379 [22] Noble BR, Babiuk RP, Clugston RD, Underhill TM, Sun H, Kawaguchi R, et al.  
380 Mechanisms of action of the congenital diaphragmatic hernia-inducing teratogen nitrofen. *Am*  
381 *J Physiol Lung Cell Mol Physiol*. 2007;293:L1079–1087.
- 382 [23] Percival KR, Radi ZA. A modified Verhoeff's elastin histochemical stain to enable  
383 pulmonary arterial hypertension model characterization. *Eur J Histochem*. 2016; 60:70-74.
- 384 [24] Bruce O Okoye, Paul D Losty, David A Lloyd, John R Gosney. Effect of prenatal  
385 glucocorticoids on pulmonary vascular muscularisation in nitrofeninduced congenital  
386 diaphragmatic hernia. *J Pediatr Surg*. 1998; 33:76-80.
- 387 [25] Rondelet B, Kerbaul F, Motte S, van Beneden R, Rimmelink M, Brimiouille S, et al.  
388 Bosentan for the prevention of overcirculation-induced experimental pulmonary arterial  
389 hypertension. *Circulation*. 2003; 107(9):1329-1335.
- 390 [26] Emery JL, Mithal A. The number of alveoli in the terminal respiratory unit of man  
391 during late intrauterine life and childhood. *Arch Dis Child*. 1960; 35:544-547.
- 392 [27] He JL, Bao QK, Yan M, Liang J, Zhu Y, Wang CJ, et al. The role of  
393 Hippo/yes-associated protein signalling in vascular remodelling associated with  
394 cardiovascular disease. *Br J Pharmacol*. 2018; 175:1354-1361.
- 395 [28] Dong J, Feldmann G, Huang J, Wu S, Zhang NL, Comerford SA, et al. Elucidation of a  
396 universal size-control mechanism in *Drosophila* and mammals. *Cell*. 2007; 130: 1120-1133.
- 397 [29] Callus BA, Verhagen AM, Vaux DL. Association of mammalian sterile twenty kinases,  
398 Mst1 and Mst2, with hSalvador via C-terminal coiled-coil domains, leads to its stabilization

399 and phosphorylation. FEBS J. 2006; 273: 4264-4276.

400 [30] Meng Z, Moroishi T, Guan KL. Mechanisms of Hippo pathway regulation. Genes Dev.

401 2016; 30:1-17.

402 [31] Zhou Q, Li L, Zhao B, Guan KL. The hippo pathway in heart development, regeneration,

403 and diseases. Circ Res. 2015; 116: 1431-1447.

404 [32] Kudryashova TV, Goncharov DA, Pena A, Kelly N, Vanderpool R, Baust J, et al.

405 HIPPO-Integrin-linked Kinase Cross-Talk Controls Self-Sustaining Proliferation and Survival

406 in Pulmonary Hypertension. Am J Respir Crit Care Med. 2016; 194:866-877.

407 [33] Bertero T, Cottrill KA, Lu Y, Haeger CM, Dieffenbach P, Annis S, et al. Matrix

408 remodeling promotes pulmonary hypertension through feedback mechanoactivation of the

409 YAP/TAZ-miR-130/301 circuit. Cell Rep. 2015; 13: 1016-1032.

410 [34] Pan D. The hippo signaling pathway in development and cancer. Developmental cell.

411 2010; 19:491-505.

412 [35] Mo JS, Park HW, Guan, KL. The Hippo signaling pathway in stem cell biology and

413 cancer. EMBO reports. 2014; 15:642-656.

414 [36] Nantie LB, Young RE, Paltzer WG, Zhang Y, Johnson RL, Verheyden JM, et al. Lats1/2

415 inactivation reveals Hippo function in alveolar type I cell differentiation during lung

416 transition to air breathing. Development. 2018; 145: <https://doi.org/10.1242/dev.163105>

417 [37] Reginensi A, Enderle L, Gregorieff A, Johnson RL, Wrana JL, McNeill H. A critical role

418 for NF2 and the Hippo pathway in branching morphogenesis. Nat Commun. 2016; 7: 12309

419 [38] Szymaniak AD, Mi R, McCarthy SE, Gower AC, Reynolds TL, Mingueneau M, et al.

420 The Hippo pathway effector YAP is an essential regulator of ductal progenitor patterning in

421 the mouse submandibular gland. *Elife*. 2017; 6: 23499

422 [39] Lin C, Yao E, Chuang PT. A conserved MST1/2-YAP axis mediates Hippo signaling

423 during lung growth. *Dev Biol*. 2015; 403:101-113.

424 [40] Otsubo K, Goto H, Nishio M, K Kawamura, S Yanagi, W Nishie, et al.

425 MOB1-YAP1/TAZ-NKX2.1 axis controls bronchioalveolar cell differentiation, adhesion and

426 tumour formation. *Oncogene*. 2017; 36:4201-4211.

427

428

429

430

431 **Figure 1**

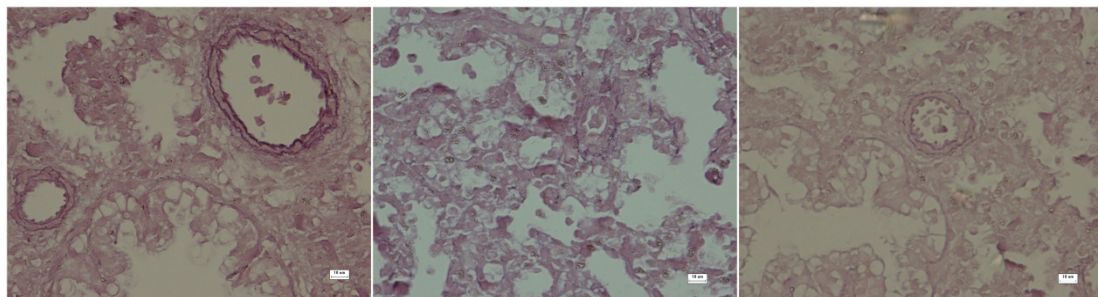

432

433 **A**

**B**

**C**

434 **Figure 2**

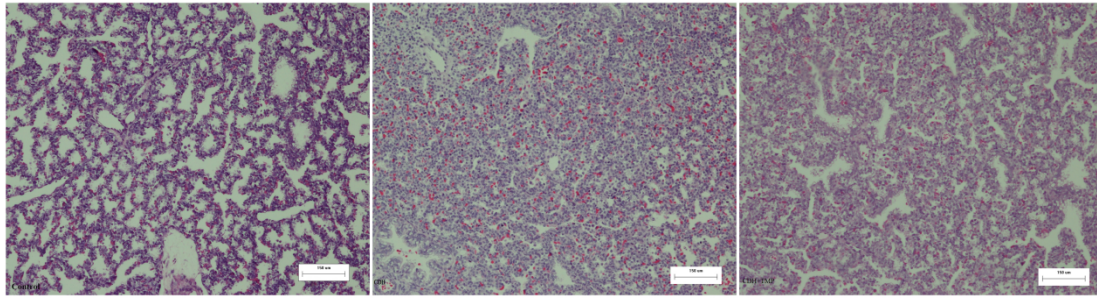

435

436

**A**

**B**

**C**

437

438

439

440

441

442

443

444

445

446

447 **Figure 3**

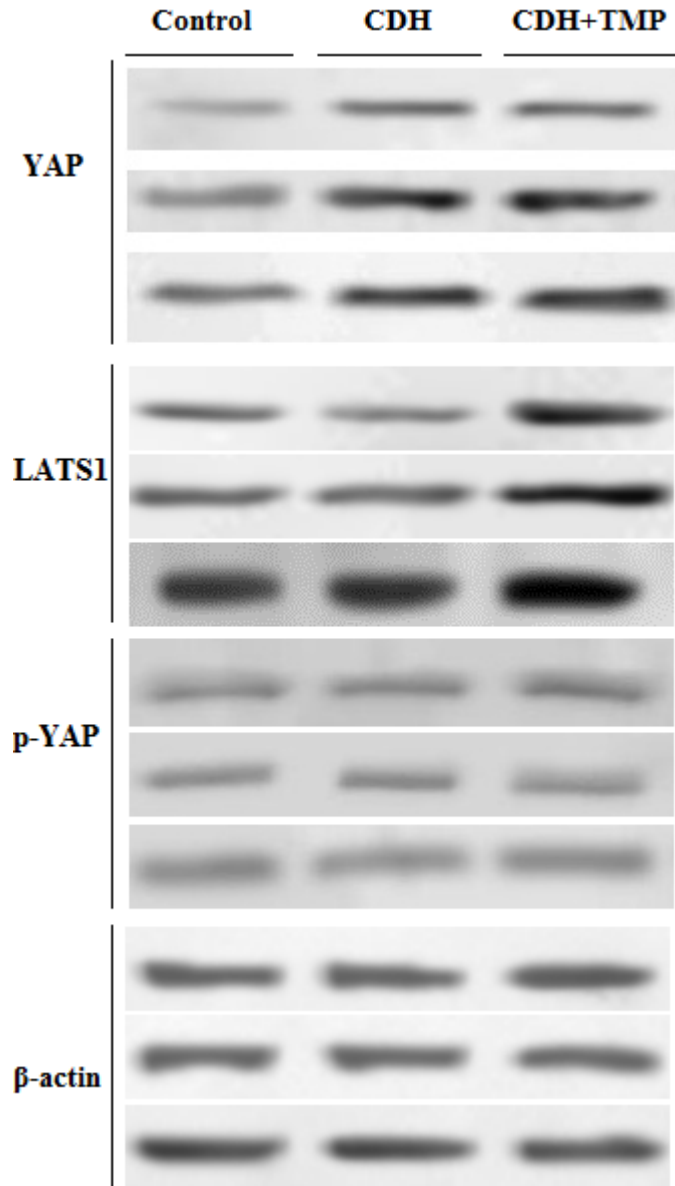

448

449 A



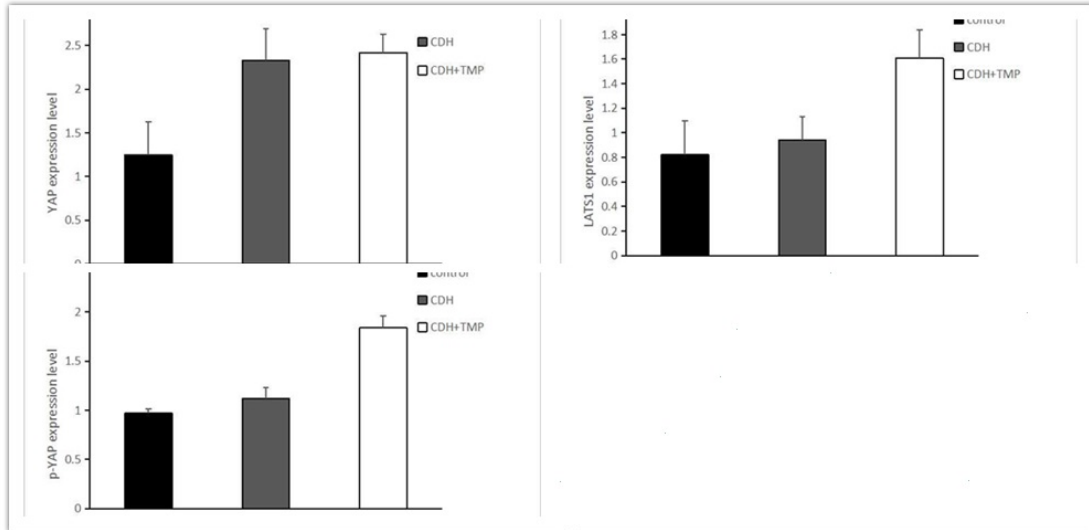

450

451 B

452
